# Supplementary material
Source: ML conference proceedings conference paper supplement (https://openaccess.thecvf.com/content/CVPR2026/html/Sun_Saliency-Guided_Representation_with_CVPR_2026_paper.html)
Supplement: Supplementary file 1 [file Sun_Saliency-Guided_Representation_with_CVPR_2026_supplemental.pdf]

## Appendix

001

002

## A. Full results on the ExORL benchmark

We evaluate the generalization performance of SRCP and baseline methods across 16 visual continuous control tasks from 4 domains in the ExORL benchmark, using 4 different datasets for pretraining. All methods are pretrained from raw pixel observations for 500k steps. During evaluation, 10k transitions of task-specific visual-based data are provided to infer the skill vectors for downstream tasks, enabling zero-shot generalization. Fig.1 (a) summarizes the overall performance of SRCP and baseline methods across all 16 tasks from 4 domains with 4 datasets with 4 seeds. The results show that SRCP achieves SOTA overall performance, demonstrating superior zero-shot generalization ability. Fig.1 (b) provides a detailed breakdown of performance across 4 domains. The results highlight that SRCP achieves the best or near-best performance in each domain. Furthermore, the comparison between SRCP and HILP highlights the architectural improvements that SRCP brings to SR methods.

003

004

005

006

007

008

009

010

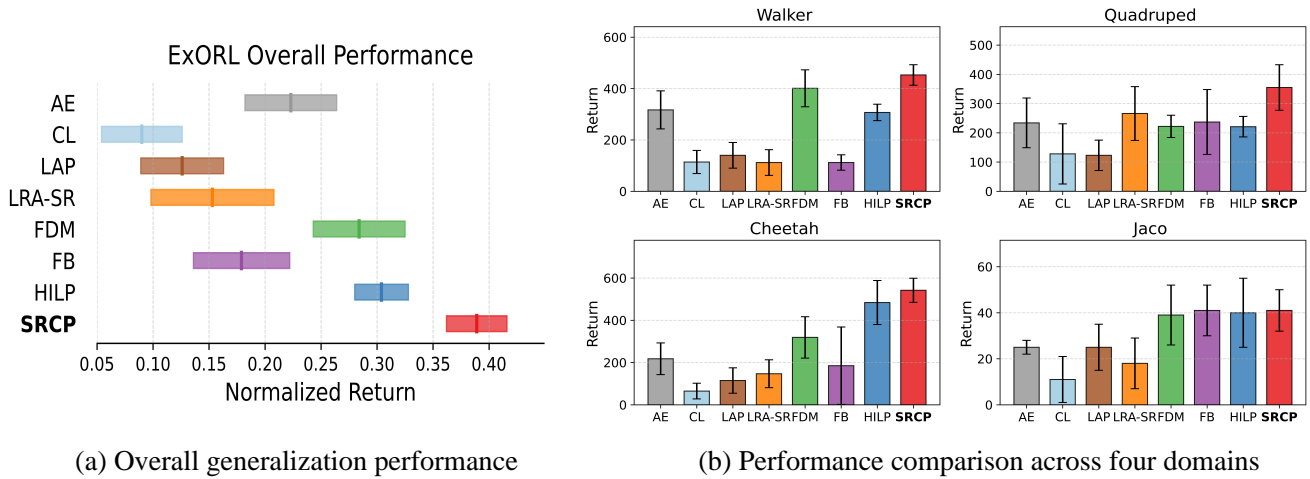

(a) Overall generalization performance

(b) Performance comparison across four domains

Figure 1. Zero-shot generalization performance on visual tasks. (a) Overall performance of each method evaluated on 4 datasets, 4 domains, and 4 tasks per domain using 4 random seeds (i.e., 256 values in total). (b) Performance in 4 domains.

011

012 Fig.2 illustrates the comparative performance of the SRCP method against baseline approaches across all tasks. Notably,  
013 SRCP consistently attains either superior or near-optimal performance across all tasks, highlighting its effectiveness across a  
014 diverse range of tasks. The complete results (unnormalized returns) are reported in Table 1, with all methods evaluated using  
015 4 random seeds.

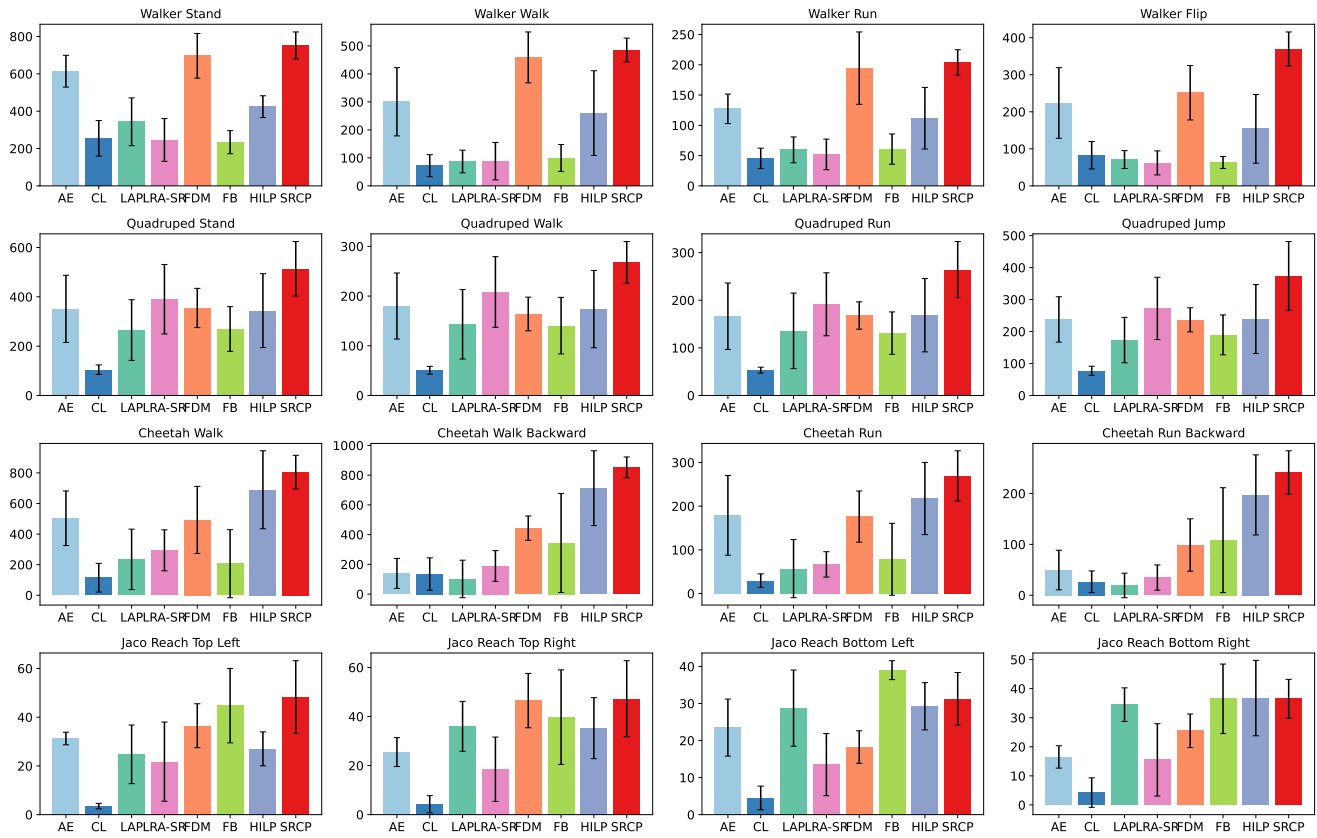

Figure 2. Experimental results on the pixel-based ExORL benchmark for each task, aggregated over four datasets and four random seeds (i.e., 16 runs in total).

Table 1. Zero-shot Performance across Multiple Domains

| Dataset   | Domain    | Task               | AE        | CL       | LAP      | LRA-SR   | FDM       | FB        | HILP      | SRCP      |          |
|-----------|-----------|--------------------|-----------|----------|----------|----------|-----------|-----------|-----------|-----------|----------|
| RND       | Walker    | Stand              | 546 ± 30  | 144 ± 4  | 296 ± 35 | 213 ± 49 | 557 ± 99  | 135 ± 12  | 386 ± 98  | 671 ± 51  |          |
|           |           | Walk               | 358 ± 12  | 36 ± 1   | 49 ± 5   | 147 ± 16 | 452 ± 52  | 48 ± 9    | 326 ± 31  | 520 ± 32  |          |
|           |           | Run                | 125 ± 7   | 25 ± 2   | 43 ± 2   | 82 ± 3   | 146 ± 60  | 31 ± 10   | 121 ± 20  | 194 ± 38  |          |
|           |           | Flip               | 265 ± 14  | 50 ± 3   | 35 ± 2   | 101 ± 14 | 282 ± 52  | 36 ± 15   | 92 ± 35   | 369 ± 25  |          |
|           |           | Average            | 324       | 64       | 106      | 147      | 359       | 63        | 231       | 439       |          |
|           | Quadruped | Stand              | 467 ± 31  | 114 ± 12 | 446 ± 18 | 476 ± 37 | 374 ± 85  | 257 ± 42  | 455 ± 84  | 703 ± 22  |          |
|           |           | Walk               | 248 ± 21  | 58 ± 4   | 252 ± 26 | 274 ± 4  | 199 ± 63  | 104 ± 12  | 254 ± 31  | 339 ± 27  |          |
|           |           | Run                | 228 ± 30  | 59 ± 7   | 252 ± 35 | 239 ± 18 | 192 ± 29  | 105 ± 36  | 241 ± 12  | 361 ± 24  |          |
|           |           | Jump               | 274 ± 55  | 88 ± 12  | 270 ± 11 | 340 ± 31 | 273 ± 66  | 164 ± 22  | 269 ± 28  | 535 ± 14  |          |
|           |           | Average            | 304       | 80       | 305      | 332      | 260       | 158       | 305       | 485       |          |
|           | Cheetah   | Walk               | 658 ± 98  | 275 ± 10 | 181 ± 15 | 445 ± 95 | 470 ± 182 | 559 ± 102 | 895 ± 33  | 859 ± 34  |          |
|           |           | Walk Backward      | 5 ± 2     | 100 ± 6  | 25 ± 9   | 196 ± 8  | 441 ± 107 | 803 ± 58  | 927 ± 35  | 934 ± 45  |          |
|           |           | Run                | 258 ± 16  | 51 ± 8   | 40 ± 7   | 106 ± 33 | 178 ± 41  | 211 ± 34  | 276 ± 46  | 322 ± 44  |          |
|           |           | Run Backward       | 3 ± 3     | 19 ± 3   | 5 ± 1    | 24 ± 2   | 126 ± 9   | 243 ± 18  | 297 ± 46  | 293 ± 42  |          |
|           |           | Average            | 231       | 111      | 63       | 193      | 304       | 454       | 599       | 602       |          |
|           | Jaco      | Reach Top Left     | 28 ± 3    | 5 ± 3    | 40 ± 8   | 38 ± 4   | 40 ± 16   | 45 ± 14   | 23 ± 9    | 53 ± 9    |          |
|           |           | Reach Top Right    | 20 ± 7    | 10 ± 4   | 24 ± 5   | 20 ± 4   | 38 ± 21   | 70 ± 10   | 39 ± 5    | 60 ± 7    |          |
|           |           | Reach Bottom Left  | 22 ± 4    | 10 ± 2   | 43 ± 4   | 21 ± 11  | 20 ± 14   | 63 ± 51   | 28 ± 6    | 43 ± 8    |          |
|           |           | Reach Bottom Right | 22 ± 4    | 13 ± 3   | 35 ± 5   | 33 ± 9   | 16 ± 8    | 51 ± 9    | 47 ± 5    | 42 ± 8    |          |
|           |           | Average            | 23        | 10       | 36       | 28       | 29        | 52        | 34        | 50        |          |
|           | Proto     | Walker             | Stand     | 677 ± 18 | 316 ± 3  | 389 ± 7  | 156 ± 5   | 854 ± 46  | 241 ± 32  | 365 ± 33  | 830 ± 39 |
|           |           |                    | Walk      | 216 ± 38 | 125 ± 2  | 78 ± 3   | 28 ± 2    | 563 ± 268 | 92 ± 7    | 117 ± 12  | 504 ± 66 |
|           |           |                    | Run       | 122 ± 5  | 60 ± 1   | 67 ± 1   | 26 ± 1    | 267 ± 44  | 48 ± 6    | 61 ± 8    | 227 ± 16 |
|           |           |                    | Flip      | 155 ± 27 | 132 ± 4  | 75 ± 2   | 29 ± 2    | 212 ± 65  | 74 ± 6    | 80 ± 15   | 428 ± 75 |
| Average   |           |                    | 293       | 158      | 152      | 60       | 474       | 114       | 156       | 497       |          |
| Quadruped |           | Stand              | 120 ± 7   | 112 ± 9  | 138 ± 10 | 163 ± 18 | 226 ± 65  | 193 ± 14  | 86 ± 8    | 455 ± 21  |          |
|           |           | Walk               | 70 ± 6    | 56 ± 3   | 68 ± 6   | 91 ± 9   | 108 ± 39  | 110 ± 11  | 45 ± 9    | 234 ± 3   |          |
|           |           | Run                | 48 ± 5    | 54 ± 6   | 52 ± 4   | 80 ± 12  | 120 ± 21  | 108 ± 12  | 39 ± 5    | 230 ± 18  |          |
|           |           | Jump               | 116 ± 8   | 71 ± 3   | 89 ± 10  | 104 ± 11 | 182 ± 22  | 129 ± 16  | 67 ± 11   | 238 ± 68  |          |
|           |           | Average            | 89        | 73       | 87       | 110      | 159       | 135       | 59        | 289       |          |
| Cheetah   |           | Walk               | 206 ± 49  | 46 ± 4   | 74 ± 41  | 109 ± 28 | 150 ± 126 | 20 ± 21   | 351 ± 67  | 624 ± 44  |          |
|           |           | Walk Backward      | 117 ± 24  | 56 ± 3   | 25 ± 9   | 59 ± 11  | 384 ± 232 | 8 ± 5     | 692 ± 26  | 856 ± 44  |          |
|           |           | Run                | 30 ± 6    | 7 ± 1    | 5 ± 1    | 24 ± 3   | 87 ± 67   | 6 ± 5     | 157 ± 22  | 174 ± 43  |          |
|           |           | Run Backward       | 21 ± 2    | 10 ± 1   | 5 ± 2    | 10 ± 2   | 41 ± 22   | 7 ± 3     | 100 ± 15  | 208 ± 12  |          |
|           |           | Average            | 94        | 30       | 27       | 51       | 166       | 10        | 325       | 466       |          |
| Jaco      |           | Reach Top Left     | 30 ± 9    | 4 ± 2    | 32 ± 8   | 5 ± 2    | 43 ± 25   | 47 ± 12   | 39 ± 5    | 43 ± 11   |          |
|           |           | Reach Top Right    | 34 ± 6    | 2 ± 1    | 50 ± 10  | 4 ± 1    | 48 ± 21   | 43 ± 9    | 44 ± 6    | 57 ± 5    |          |
|           |           | Reach Bottom Left  | 33 ± 8    | 3 ± 3    | 34 ± 6   | 2 ± 1    | 24 ± 22   | 38 ± 11   | 24 ± 5    | 30 ± 10   |          |
|           |           | Reach Bottom Right | 18 ± 7    | 1 ± 1    | 40 ± 4   | 1 ± 1    | 26 ± 21   | 43 ± 4    | 29 ± 4    | 44 ± 19   |          |
|           |           | Average            | 29        | 3        | 39       | 3        | 35        | 43        | 34        | 44        |          |
| APS       |           | Walker             | Stand     | 516 ± 12 | 377 ± 17 | 519 ± 38 | 441 ± 13  | 608 ± 90  | 304 ± 22  | 429 ± 26  | 689 ± 24 |
|           |           |                    | Walk      | 158 ± 13 | 95 ± 1   | 155 ± 20 | 100 ± 4   | 317 ± 156 | 81 ± 4    | 120 ± 19  | 413 ± 27 |
|           |           |                    | Run       | 97 ± 5   | 64 ± 3   | 91 ± 5   | 72 ± 1    | 126 ± 26  | 51 ± 13   | 74 ± 14   | 174 ± 18 |
|           |           |                    | Flip      | 116 ± 8  | 105 ± 4  | 103 ± 10 | 87 ± 5    | 158 ± 25  | 66 ± 8    | 133 ± 12  | 299 ± 39 |
|           | Average   |                    | 222       | 160      | 217      | 175      | 303       | 126       | 189       | 394       |          |
|           | Quadruped | Stand              | 426 ± 18  | 72 ± 5   | 310 ± 80 | 533 ± 37 | 444 ± 16  | 421 ± 16  | 415 ± 44  | 471 ± 27  |          |
|           |           | Walk               | 206 ± 14  | 38 ± 5   | 154 ± 38 | 254 ± 11 | 176 ± 25  | 239 ± 12  | 197 ± 18  | 257 ± 14  |          |
|           |           | Run                | 195 ± 12  | 43 ± 2   | 165 ± 57 | 243 ± 27 | 172 ± 27  | 208 ± 14  | 193 ± 19  | 260 ± 35  |          |
|           |           | Jump               | 268 ± 17  | 57 ± 5   | 210 ± 26 | 323 ± 20 | 221 ± 23  | 294 ± 9   | 256 ± 23  | 389 ± 61  |          |
|           |           | Average            | 274       | 53       | 210      | 338      | 253       | 318       | 265       | 344       |          |
|           | Cheetah   | Walk               | 625 ± 44  | 52 ± 7   | 570      | 226 ± 9  | 613 ± 77  | 12 ± 2    | 273 ± 383 | 821 ± 122 |          |
|           |           | Walk Backward      | 288 ± 126 | 63 ± 7   | 37       | 155 ± 39 | 371 ± 307 | 48 ± 7    | 967 ± 8   | 742 ± 51  |          |
|           |           | Run                | 179 ± 31  | 30 ± 5   | 170      | 68 ± 3   | 189 ± 41  | 13 ± 5    | 118 ± 113 | 275 ± 11  |          |
|           |           | Run Backward       | 75 ± 7    | 14 ± 1   | 6        | 29 ± 4   | 59 ± 73   | 9 ± 4     | 248 ± 46  | 191 ± 61  |          |
|           |           | Average            | 292       | 40       | 196      | 120      | 308       | 21        | 402       | 507       |          |
|           | Jaco      | Reach Top Left     | 35 ± 6    | 2 ± 1    | 9 ± 1    | 6 ± 2    | 21 ± 8    | 22 ± 6    | 22 ± 9    | 28 ± 12   |          |
|           |           | Reach Top Right    | 28 ± 15   | 4 ± 2    | 29 ± 5   | 11 ± 1   | 36 ± 13   | 23 ± 4    | 14 ± 5    | 21 ± 5    |          |
|           |           | Reach Bottom Left  | 27 ± 4    | 2 ± 1    | 20 ± 4   | 22 ± 5   | 12 ± 2    | 36 ± 13   | 40 ± 7    | 28 ± 2    |          |
|           |           | Reach Bottom Right | 12 ± 5    | 2 ± 1    | 38 ± 1   | 7 ± 2    | 29 ± 18   | 19 ± 6    | 63 ± 11   | 32 ± 11   |          |
|           |           | Average            | 26        | 3        | 24       | 12       | 25        | 25        | 35        | 27        |          |
|           | APT       | Walker             | Stand     | 718 ± 78 | 182 ± 14 | 169 ± 8  | 174 ± 6   | 768 ± 110 | 256 ± 48  | 517 ± 16  | 818 ± 37 |
|           |           |                    | Walk      | 470 ± 20 | 33 ± 1   | 66 ± 3   | 32 ± 1    | 504 ± 79  | 178 ± 37  | 477 ± 21  | 505 ± 91 |
|           |           |                    | Run       | 165 ± 15 | 33 ± 3   | 37 ± 3   | 28 ± 2    | 239 ± 34  | 67 ± 6    | 191 ± 14  | 220 ± 29 |
|           |           |                    | Flip      | 359 ± 17 | 44 ± 4   | 71 ± 4   | 31 ± 2    | 353 ± 37  | 77 ± 8    | 311 ± 11  | 381 ± 55 |
| Average   |           |                    | 428       | 73       | 86       | 66       | 466       | 145       | 374       | 481       |          |
| Quadruped |           | Stand              | 392 ± 34  | 121 ± 5  | 167 ± 5  | 389 ± 35 | 375 ± 112 | 207 ± 25  | 420 ± 37  | 425 ± 91  |          |
|           |           | Walk               | 196 ± 19  | 51 ± 5   | 99 ± 22  | 214 ± 7  | 173 ± 36  | 109 ± 9   | 199 ± 12  | 241 ± 49  |          |
|           |           | Run                | 195 ± 35  | 57 ± 4   | 74 ± 3   | 204 ± 9  | 188 ± 38  | 103 ± 8   | 201 ± 14  | 207 ± 10  |          |
|           |           | Jump               | 293 ± 47  | 93 ± 2   | 124 ± 8  | 322 ± 22 | 270 ± 40  | 171 ± 12  | 364 ± 25  | 333 ± 91  |          |
|           |           | Average            | 269       | 81       | 116      | 282      | 252       | 148       | 296       | 302       |          |
| Cheetah   |           | Walk               | 524 ± 42  | 86 ± 3   | 114 ± 15 | 395 ± 84 | 737 ± 54  | 234 ± 63  | 899 ± 55  | 916 ± 44  |          |
|           |           | Walk Backward      | 147 ± 81  | 321 ± 36 | 320 ± 44 | 346 ± 40 | 578 ± 137 | 519 ± 79  | 604 ± 41  | 878 ± 121 |          |
|           |           | Run                | 249 ± 62  | 30 ± 1   | 13 ± 6   | 69 ± 16  | 251 ± 18  | 84 ± 17   | 319 ± 32  | 306 ± 11  |          |
|           |           | Run Backward       | 99 ± 60   | 63 ± 2   | 61 ± 17  | 76 ± 9   | 169 ± 109 | 174 ± 42  | 144 ± 23  | 273 ± 8   |          |
|           |           | Average            | 255       | 125      | 127      | 222      | 434       | 253       | 492       | 593       |          |
| Jaco      |           | Reach Top Left     | 32 ± 15   | 3 ± 1    | 18 ± 1   | 38 ± 10  | 42 ± 8    | 65 ± 19   | 24 ± 10   | 69 ± 13   |          |
|           |           | Reach Top Right    | 20 ± 3    | 1 ± 1    | 41 ± 4   | 39 ± 11  | 64 ± 27   | 23 ± 6    | 44 ± 8    | 51 ± 10   |          |
|           |           | Reach Bottom Left  | 12 ± 4    | 3 ± 1    | 18 ± 1   | 9 ± 1    | 17 ± 9    | 39 ± 6    | 25 ± 5    | 24 ± 3    |          |
|           |           | Reach Bottom Right | 14 ± 4    | 1 ± 1    | 35 ± 7   | 21 ± 7   | 31 ± 32   | 33 ± 6    | 27 ± 4    | 28 ± 3    |          |
|           |           | Average            | 20        | 2        | 26       | 27       | 39        | 40        | 30        | 43        |          |

016 **B. Pseudo-code**

017 We present the pseudocode for training SRCP in the offline visual unsupervised reinforcement learning setting in Algorithm  
 018 1. Specifically, the procedure illustrates how SRCP incorporates the HILP method to learn skill-conditioned representations  
 019 during the pretraining phase.

**Algorithm 1** SRCP Algorithm

---

```

1: Inputs: pre-collected dataset  $\mathcal{D}$ , randomly initialized representation network  $f_\theta$ , basic feature networks  $\varphi_\nu$ , successor
   feature network  $\psi_\kappa$ , actor network  $\pi_\zeta$ , learning rate  $\eta$ , mini-batch size  $b$ , number of gradient updates step  $M$ , number of
   gradient updates every step  $N$ , skill update period  $T$ , temperature  $\tau$ .
2: for  $m = 1$  to  $M$  do
3:   for  $n = 1$  to  $N$  do
4:     Sample a mini-batch of transitions  $\{(o_i, a_i, o_{i+1})\}_{i \in I} \subset \mathcal{D}$  of size  $|I| = b$ .
5:     Sample a mini-batch of target state-action pairs  $\{(o'_i, a'_i)\}_{i \in I} \subset \mathcal{D}$  of size  $|I| = b$ .
6:     Sample a mini-batch of  $\{z_i\}_{i \in I} \sim p(z)$  of size  $|I| = b$ .
7:     /* Generate saliency maps */
8:     Generate saliency maps  $o_\alpha$  from observation  $o$ .
9:     /* Update encoder */
10:    Compute saliency dynamics representation learning objective  $L(\theta)$  with equation (5).
11:    Update  $\theta \leftarrow \theta - \eta \nabla L(\theta)$ .
12:    /* Update basic feature and successor feature */
13:    Compute HILP basic feature objective  $L(\nu)$  with:
      
$$\mathcal{L}_\nu = \sum_{i=1}^2 \mathbb{E}_{(f(o), a, f(o'), g)} \left[ (r + \gamma(1-r) \cdot V'_i(f(o'), g) - V_i(f(o), g))^2 \right]$$

14:    Compute successor measure loss with:
      
$$\mathcal{L}_\kappa = \|\varphi(f(o'))z + \gamma\psi(f(o'), a', z)z - \psi(f(o), a, z)z\|^2$$

15:    Update  $\nu, \kappa \leftarrow \nu, \kappa - \eta \nabla L(\nu) - \eta \nabla L(\kappa)$ .
16:    /* Update policy */
17:    Compute actor loss function  $L(\zeta)$  with equation (11).
18:    Update  $\zeta \leftarrow \zeta - \eta \nabla L(\zeta)$ .
19:   end for
20:   /* Update target network parameters */
21:    $\kappa^- \leftarrow \tau \kappa + (1 - \tau) \kappa^-$ 
22: end for

```

---

## C. Theoretical analysis

**Proposition 1** ([27, Prop. 16]). *Let  $\tau : S \times A \rightarrow G$  be a mapping into a goal space  $G$ . Let  $\pi$  be a policy, and let  $M^\pi$  denote its successor state measure in goal space  $G$ , as defined in (10). Assume that  $M^\pi(s, a, \cdot)$  is absolutely continuous with respect to a positive measure  $\rho$  on  $G$ , and let  $m^\pi$  be its Radon–Nikodym derivative. For any measurable function  $r : G \rightarrow \mathbb{R}$ , define the reward  $R(s, a) := r(\tau(s, a))$ . Then the  $Q$ -function of policy  $\pi$  under reward  $R$  satisfies*

$$\begin{aligned} Q^\pi(s, a) &= \int_G r(g) M^\pi(s, a, dg) \\ &= \int_G r(g) m^\pi(s, a, g) \rho(dg). \end{aligned} \quad (1)$$

*Proof.* For each time  $t \geq 0$ , let  $P_t^\pi(s_0, a_0, dg)$  denote the distribution of  $g = \tau(s_t, a_t)$  under trajectories generated by policy  $\pi$  starting from  $(s_0, a_0)$ . By definition of the successor state measure:

$$M^\pi(s, a, dg) = \sum_{t \geq 0} \gamma^t P_t^\pi(s, a, dg). \quad (2)$$

By definition of the density  $m^\pi$ , the  $Q$ -function of  $\pi$  under reward  $R$  satisfies:

$$\begin{aligned} Q^\pi(s, a) &= \sum_{t \geq 0} \gamma^t \mathbb{E}[R(s_t, a_t) \mid s_0 = s, a_0 = a, \pi] \\ &= \sum_{t \geq 0} \gamma^t \mathbb{E}[r(\tau(s_t, a_t)) \mid s_0 = s, a_0 = a, \pi] \\ &= \sum_{t \geq 0} \gamma^t \int_G r(g) P_t^\pi(s, a, dg) \\ &= \int_G r(g) M^\pi(s, a, dg). \end{aligned} \quad (3)$$

□

**Proposition 2** ([27, Prop. 18]). *Let  $f : S \times A \rightarrow \mathbb{R}$  be an arbitrary function, and define the policy  $\pi_f$  by  $\pi_f(s) := \arg \max_a f(s, a)$ . Let  $r : S \times A \rightarrow \mathbb{R}$  be a bounded reward function,  $Q^*$  the optimal  $Q$ -function for  $r$ , and  $Q^{\pi_f}$  the  $Q$ -function of policy  $\pi_f$  under reward  $r$ . Then:*

$$\sup_{S \times A} |f - Q^*| \leq \frac{2}{1 - \gamma} \sup_{S \times A} |f - Q^{\pi_f}|, \quad (4)$$

and

$$\sup_{S \times A} |Q^{\pi_f} - Q^*| \leq \frac{3}{1 - \gamma} \sup_{S \times A} |f - Q^{\pi_f}|. \quad (5)$$

*Proof.* We restate the proof here for completeness. Define the approximation error

$$\varepsilon(s, a) := Q^{\pi_f}(s, a) - f(s, a). \quad (6)$$

The  $Q$ -function  $Q^{\pi_f}$  satisfies the Bellman equation

$$Q^{\pi_f}(s, a) = r(s, a) + \gamma \mathbb{E}_{s' | (s, a)} Q^{\pi_f}(s', \pi_f(s')). \quad (7)$$

Substituting  $Q^{\pi_f} = f + \varepsilon$ , we obtain

$$\begin{aligned} f(s, a) &= r(s, a) - \varepsilon(s, a) + \gamma \mathbb{E}_{s' | (s, a)} [f(s', \pi_f(s')) + \varepsilon(s', \pi_f(s'))] \\ &= r(s, a) - \varepsilon'(s, a) + \gamma \mathbb{E}_{s' | (s, a)} f(s', \pi_f(s')) \\ &= r(s, a) - \varepsilon'(s, a) + \gamma \mathbb{E}_{s' | (s, a)} \max_{a'} f(s', a'), \end{aligned} \quad (8)$$

044 where

$$045 \quad \varepsilon'(s, a) := \varepsilon(s, a) - \gamma \mathbb{E}_{s'| (s, a)} \varepsilon(s', \pi_f(s')).$$

046 Equation (6) corresponds to the optimal Bellman equation for the modified reward function  $r - \varepsilon'$ . Hence,  $f$  is the optimal  
047  $Q$ -function associated with reward  $r - \varepsilon'$ . Since  $Q^*$  is the optimal  $Q$ -function for the original reward  $r$ , it follows that

$$048 \quad \sup_{S \times A} |f - Q^*| \leq \frac{1}{1 - \gamma} \sup_{S \times A} |\varepsilon'|.$$

049 By the definition of  $\varepsilon'$ , we have

$$050 \quad \sup_{S \times A} |\varepsilon'| \leq 2 \sup_{S \times A} |\varepsilon| = 2 \sup_{S \times A} |f - Q^{\pi_f}|,$$

051 which establishes the first inequality. The second inequality follows from the triangle inequality

$$052 \quad |Q^{\pi_f} - Q^*| \leq |Q^{\pi_f} - f| + |f - Q^*|,$$

053 and observing that  $\frac{2}{1-\gamma} + 1 \leq \frac{3}{1-\gamma}$ . □

054 **Theorem 1.** Let  $\varphi : S \times A \rightarrow \mathbb{R}^d$  be a set of base features, and let  $\psi^{\pi_z}(s, a) = \int \varphi(s', a') M^{\pi_z}(s, a, ds' da')$  be the true  
055 successor features of policy  $\pi_z$ . Let  $\hat{M}^z$  be an estimated successor measure and define the estimated successor features

$$056 \quad \hat{\psi}^z(s, a) = \int \varphi(s', a') \hat{M}^z(s, a, ds' da').$$

057 For each  $z \in Z$ , define the policy

$$058 \quad \pi_z(s) = \arg \max_a \hat{\psi}^z(s, a)^\top z.$$

059 Assume the reward is linearly represented by the features,

$$060 \quad r(s, a) = \varphi(s, a)^\top z_r,$$

061 where  $z_r = \mathbb{E}_\rho[\varphi \varphi^\top]^{-1} \mathbb{E}_\rho[\varphi r]$  is the least-squares coefficient under a reference distribution  $\rho$ . Let  $V^*$  be the optimal value  
062 function for  $r$ , and let  $\hat{V}^{\pi_z}$  be the value function of  $\pi_z$  under the same reward. Then the suboptimality of the zero-shot policy  
063  $\pi_{z_r}$  is controlled by the successor-feature approximation error:

$$064 \quad \|\hat{V}^{\pi_{z_r}} - V^*\|_\infty \leq \frac{3\|z_r\|_*}{1 - \gamma} \sup_{s, a} \|\hat{\psi}^{z_r}(s, a) - \psi^{\pi_{z_r}}(s, a)\|. \quad (7)$$

065 Moreover, for any  $z \in Z$ , the approximation error of  $\hat{\psi}$  controls the deviation from the optimal  $Q$ -function:

$$066 \quad \sup_{s, a} \left| \hat{\psi}^z(s, a)^\top z - Q^*(s, a) \right| \leq \frac{2\|z\|_*}{1 - \gamma} \sup_{s, a} \|\hat{\psi}^z(s, a) - \psi^{\pi_z}(s, a)\|. \quad (8)$$

067 **Remark.** The bounds (7)–(8) show that the suboptimality of policies derived from approximate successor features is con-  
068 trolled by the approximation error of  $\psi$ , providing a quantitative bound on the zero-shot generalization performance.

069 *Proof.* Let  $z \in Z$  and consider the reward  $r(s, a) = \varphi(s, a)^\top z_r$ . By definition of the successor feature,

$$070 \quad \psi^{\pi_z}(s, a) = \int \varphi(s', a') M^{\pi_z}(s, a, ds' da').$$

071 Similarly, the estimated successor feature satisfies

$$072 \quad \hat{\psi}^z(s, a) = \int \varphi(s', a') \hat{M}^z(s, a, ds' da').$$

073 Define the error measure between the true and estimated successor measures:

$$074 \quad \varepsilon_z(s, a, ds' da') := M^{\pi_z}(s, a, ds' da') - \hat{M}^z(s, a, ds' da').$$

By Proposition 1 with  $G = S \times A$ , the  $Q$ -function of policy  $\pi_z$  satisfies

$$\begin{aligned}
 Q^{\pi_z}(s, a) &= \int r(s', a') M^{\pi_z}(s, a, ds' da') && 075 \\
 &= \int r(s', a') \hat{M}^z(s, a, ds' da') + \int r(s', a') \varepsilon_z(s, a, ds' da') && 076 \\
 &= \hat{\psi}^z(s, a)^\top z_r + \int r(s', a') \varepsilon_z(s, a, ds' da'). && 077 \\
 &&& (9) \quad 078
 \end{aligned}$$

By the dual norm property,

$$\left| \int r(s', a') \varepsilon_z(s, a, ds' da') \right| \leq \|z_r\|_* \|\hat{\psi}^z(s, a) - \psi^{\pi_z}(s, a)\|, \quad 079 \quad 080$$

where  $\|\cdot\|_*$  is the dual norm corresponding to the norm used in the supremum over measures. Let  $f(s, a) := \hat{\psi}^{z_r}(s, a)^\top z_r$  and recall that  $\pi_{z_r}(s) = \arg \max_a f(s, a)$ . Then, by the Proposition 2,

$$\begin{aligned}
 \|\hat{V}^{\pi_{z_r}} - V^*\|_\infty &\leq \frac{3}{1-\gamma} \sup_{s,a} |f(s, a) - Q^{\pi_{z_r}}(s, a)| && 083 \\
 &\leq \frac{3\|z_r\|_*}{1-\gamma} \sup_{s,a} \|\hat{\psi}^{z_r}(s, a) - \psi^{\pi_{z_r}}(s, a)\|. && (10) \quad 084
 \end{aligned}$$

Similarly, for any  $z \in Z$ ,

$$\begin{aligned}
 \sup_{s,a} |\hat{\psi}^z(s, a)^\top z - Q^*(s, a)| &\leq \frac{2}{1-\gamma} \sup_{s,a} |\hat{\psi}^z(s, a)^\top z - Q^{\pi_z}(s, a)| && 085 \\
 &\leq \frac{2\|z\|_*}{1-\gamma} \sup_{s,a} \|\hat{\psi}^z(s, a) - \psi^{\pi_z}(s, a)\|. && (11) \quad 086 \quad 087
 \end{aligned}$$

This completes the proof, establishing that the suboptimality of policies derived from approximate successor features is controlled by the approximation error of  $\hat{\psi}$ .  $\square$

088  
089

090 **D. Extended Background**

091 Reinforcement Learning (RL) [26, 29, 32] has achieved remarkable success in learning task-specific behaviors when guided  
092 by handcraft extrinsic rewards. However, such supervision often requires extensive manual effort and limits generalization to  
093 novel tasks. Inspired by the effectiveness of unsupervised pretraining in computer vision [?] and natural language process-  
094 ing [?], Unsupervised Reinforcement Learning (URL) has emerged as a promising paradigm that enables agents to acquire  
095 reusable representations [17, 31] and behaviors from reward-free interactions [4, 20]. In URL, agents are trained using task-  
096 agnostic objectives, such as intrinsic rewards or self-supervised losses, to explore environments and acquire general-purpose  
097 skills or latent representations. These pretrained components can later be adapted to downstream tasks with improved sample  
098 efficiency. Among various URL approaches, unsupervised skill discovery (USD) methods [1, 10, 14, 19] aim to developing  
099 diverse skills via reward-free learning to enable task generalization through fine-tuning. Despite these advancements, most  
100 existing USD methods focus primarily on discover diverse skills, while lacking the ability to directly generalize to new tasks  
101 without additional fine-tuning, limiting the zero-shot generalization in URL.

102 A prominent line of work in zero-shot URL builds upon the framework of successor representations (SR) [7], which de-  
103 couples environment dynamics from reward specification to support generalization across tasks. Extensions such as successor  
104 features (SF) [3] further enhance this formulation by allowing skill-conditioned value estimation. State-of-the-art zero-shot  
105 methods instantiate this idea via universal successor features (USFs) [24] or forward-backward (FB) representations [27, 28].  
106 USF-based methods typically rely on learned basic features, and a variety of techniques have been proposed to facilitate this,  
107 including Laplacian eigenfunctions [30], low-rank transition approximations [23], contrastive learning [2], and hilbert space  
108 representation learning [18]. In contrast, FB methods avoid explicit feature learning by directly modeling successor measures  
109 through jointly learned forward and backward representations. While existing SR methods exhibit strong zero-shot general-  
110 ization in structured state-based environments, they struggle to scale to visual tasks due to the challenges of learning mean-  
111 ingsful representations from high-dimensional inputs. To address this limitation, we propose Saliency-guided Representation  
112 with Consistency Policy learning (SRCP), a novel framework designed to improve generalization in visual unsupervised  
113 reinforcement learning. SRCP enhances SR-based learning through two key innovations: (1) a saliency-guided dynamics  
114 objective that learns dynamics-relevant representations by decoupling them from SR training, and (2) a consistency-based  
115 diffusion actor that models diverse skill-conditioned behaviors with improved action controllability.

116 Diffusion models [11] have shown impressive success in modeling complex, high-dimensional distributions and gener-  
117 ating diverse, high-quality samples across a variety of domains, including image generation, planning [25], and control [?  
118 ]. These properties make them especially appealing for RL, where the ability to capture expressive and multi-modal action  
119 distributions is crucial for balancing exploration and exploitation [5, 12, 21]. Recent works have demonstrated that diffusion-  
120 based policies can outperform traditional MLP-based actors, particularly in tasks requiring diverse and multi-modal behav-  
121 iors. However, the adoption of diffusion models in RL comes with a significant computational cost. Their iterative sampling  
122 process leads to high inference latency, making them inefficient for real-time decision-making and online learning scenar-  
123 ios. To mitigate this, recent advances have introduced consistency models [6, 9, 15] as efficient one-step approximations of  
124 diffusion processes. These models retain the generative expressiveness of diffusion while enabling faster inference, making  
125 them promising candidates for use in RL actor networks. Empirical results have shown that consistency models can match  
126 or even surpass diffusion policies in continuous control tasks, with substantially lower computational overhead. Despite  
127 their promising properties, consistency models remain underexplored in visual URL [13], which demands learning multi-  
128 modal skill-conditioned behaviors from high-dimensional visual inputs. To bridge this gap, we propose a consistency policy  
129 equipped with URL-specific classifier-free guidance, which promotes multi-modal action distribution modeling and skill  
130 controllability in visual tasks and improves generalization in visual URL.

## E. Experimental Setting 131

**Environments** We adopt the URL Benchmark [13] and ExORL datasets [8] to evaluate the task generalization performance in visual URL. The benchmark comprises 16 high-dimensional continuous control tasks across 4 distinct domains: *Walker*, *Quadruped*, *Cheetah*, and *Jaco*. All environments provide image-based observations with a resolution of  $64 \times 64 \times 3$ . Agents should extract effective representations and learn skill-conditioned behaviors from high-dimensional visual observations, making this benchmark particularly challenging for evaluating zero-shot task generalization in visual URL. We detail the four domains as follows: 132  
133  
134  
135  
136  
137

- **Walker Domain** involves humanoid locomotion with action space  $\mathcal{A} \in \mathbb{R}^6$ . It includes the tasks of *Walker Stand*, *Walker Walk*, *Walker Flip*, and *Walker Run*. 138  
139
- **Quadruped Domain** features four-legged locomotion with higher action space  $\mathcal{A} \in \mathbb{R}^{16}$ . It includes the tasks of *Quadruped Stand*, *Quadruped Walk*, *Quadruped Jump*, and *Quadruped Run*. 140  
141
- **Cheetah Domain** involves fast planar locomotion with action space  $\mathcal{A} \in \mathbb{R}^6$ . It includes the tasks of *Cheetah Walk*, *Cheetah Walk Backward*, *Cheetah Run*, and *Cheetah Run Backward*. 142  
143
- **Jaco Domain** includes manipulation tasks using a 9-DoF Jaco robotic arm. It includes the tasks of *Jaco Reach Top Left*, *Jaco Reach Top Right*, *Jaco Reach Bottom Left*, and *Jaco Reach Bottom Right*. 144  
145

**Datasets** To promote generalization and support reward-free pretraining, the datasets in each domain are collected using 4 distinct unsupervised exploration strategies: *Random Network Distillation (RND)*, *Active Pretraining with Successor Features (APS)*, *Active Pretraining (APT)*, and *Prototype-based Exploration (PROTO)*. Each method is designed to encourage diverse trajectories without relying on task-specific reward signals. 146  
147  
148  
149

- **Random Network Distillation (RND)** [4] leverages the prediction error of a randomly initialized neural network as an intrinsic reward. This encourages agents to explore novel states with high prediction error, thereby promoting broad state coverage. 150  
151  
152
- **Active Pretraining with Successor Features (APS)** [16] guides exploration by maximizing the norm of successor features computed from learned representations. This drives the agent toward informative and discriminative states under the successor feature formulation. 153  
154  
155
- **Active Pretraining (APT)** [17] maximizes a non-parametric entropy in an abstract representation space to drive exploration, avoiding explicit density modeling. 156  
157
- **Prototype-based Exploration (PROTO)** [31] learns a set of prototypical representations that summarize the agent’s exploratory experience. These prototypes serve as a compact basis for state encoding and are learned in a self-supervised manner without downstream task labels, facilitating efficient exploration. 158  
159  
160

These strategies generate diverse and task-agnostic trajectories, which serve as a foundation for evaluating zero-shot generalization in visual URL. 161  
162

163 **F. Baseline Methods**

164 To comprehensively evaluate the generalization of SRCP framework, we compare it against a wide range of successor repre-  
165 sentation (SR) approaches. These methods can be broadly categorized into two groups:

166 **(1) Successor Feature (SF) Methods with Different Basic Feature Learning Techniques [7].** These approaches follow  
167 the classical successor feature formulation but differ in how they learn or define the underlying basic representations:

- 168 • **Auto encoder (AE) [22]:** This method learns state embeddings by reconstructing raw observations through a bottleneck  
169 neural network. It encodes each input into a compact latent representation and then decodes it back to the original observa-  
170 tion space. By minimizing reconstruction error, the learned embeddings capture salient visual features of the environment,  
171 compressing redundant information while preserving the dominant factors of variation.
- 172 • **Successor Features with Laplacian Eigenfunctions (Lap) [30]:** This method learns state embeddings by computing  
173 the eigenfunctions of the graph Laplacian constructed from state transitions. It minimizes differences between adjacent  
174 state representations under a behavior policy while ensuring orthonormality, promoting clustering among nearby states and  
175 separation of distant ones.
- 176 • **Contrastive Learning (CL) [2]:** CL applies a SimCLR-style contrastive objective to learn representations by distinguish-  
177 ing positive state pairs (e.g., temporally close) from negatives (e.g., randomly sampled). It effectively learns features  
178 aligned with the spectral structure of the successor measure but requires full trajectories and sufficient data diversity.
- 179 • **Low-Rank Approximation of Successor Representations (LRA-SR) [30]:** LRA-SR extends CL by using temporal-  
180 difference learning to estimate the successor measure, improving stability compared to Monte Carlo estimation. It nor-  
181 malizes feature vectors to enforce orthogonality, resulting in a low-rank approximation of the successor representation  
182 matrix.
- 183 • **Forward Dynamics Model (FDM) [28]:** FDM leverages a learned forward model to predict future state embeddings from  
184 current ones, implicitly encouraging features to capture dynamics. It is a simple and scalable way to encode temporal  
185 structure for successor learning.
- 186 • **Hilbert Representations (HILP) [18]:** HILP learns basic representations by optimizing a goal-conditioned value function  
187 through inner products in a Hilbert space. Unlike contrastive or reconstruction-based methods, HILP directly aligns feature  
188 learning with the goal-reaching structure of the MDP, enabling more effective downstream adaptation.

189 **(2) Forward-Backward Representation (FB) [28]:** The FB method avoids explicit feature learning by directly estimating  
190 successor measures using forward and backward representations. It circumvents the challenges of learning stable embeddings  
191 and has achieved state-of-the-art results in zero-shot URL.

192 These baselines cover a wide spectrum of successor representation learning strategies for URL. SRCP is evaluated in com-  
193 parison to each of these to highlight its generalization capabilities in visual URL. In particular, SRCP differs by incorporating  
194 saliency-guided dynamics representation learning and consistency policy modeling, allowing it to achieve superior zero-shot  
195 performance on high-dimensional visual tasks.

## G. Hyper-parameter settings

196

In this section, we provide the detailed hyper-parameter settings of our proposed SRCP, as shown in Table 2.

197

Table 2. Hyper-parameter settings.

| Hyper-parameter            | Setting                            |
|----------------------------|------------------------------------|
| Pre-training frames        | $5e^5$                             |
| Zero-shot selection frames | $1e^4$                             |
| RL replay buffer size      | $1e6$                              |
| Frame stack                | 3                                  |
| Action repeat              | 1                                  |
| $z$ vector dimensions      | 50                                 |
| $z$ vector space           | continuous                         |
| RL backbone algorithm      | DDPG                               |
| Return discount            | 0.99                               |
| Batch size                 | 512                                |
| Optimizer                  | Adam                               |
| Learning rate              | $1e - 4$                           |
| Actor activation           | layernorm(Tanh) $\rightarrow$ ReLU |
| Agent update frequency     | 2                                  |
| Target critic network EMA  | 0.01                               |
| Exploration stddev clip    | 0.3                                |
| Exploration stddev value   | 0.2                                |
| coefficient $\omega$       | 3                                  |
| coefficient $\beta$        | 0.5                                |
| coefficient $\lambda_1$    | 0.2                                |
| coefficient $\lambda_1$    | 0.2                                |

## 198 H. Understanding the Limits of Visual Representation Learning for Successor Representations

199 **Can We Directly Learn Physical State Representations from Pixels?** To assess whether physical state supervision can  
 200 effectively guide representation learning in visual URL, we explore the feasibility of regressing low-dimensional physical  
 201 state vectors directly from image observations. Specifically, we decouple the training into two stages: (1) an encoder is  
 202 trained via supervised regression to predict physical states from visual inputs, and (2) the resulting features are used to train  
 203 a successor measure module for downstream tasks. As shown in Fig.3(a), the representation learned directly from ground-  
 204 truth physical states achieves convergence in state prediction loss, but the converged value remains high. Furthermore,  
 205 Fig.3(b) shows that, compared to learning representations directly from visual inputs using the SR objective, using ground-  
 206 truth physical states does not lead to significant performance improvement. This suggests that, even with access to accurate  
 207 physical states, the encoder still struggles to recover precise state dynamics. This limitation carries over to the successor  
 208 feature learning phase, where no notable improvement in generalization is observed. These findings suggest that accurately  
 209 reconstructing physical states from high-dimensional images is inherently challenging, and that such reconstruction-based  
 210 objectives may be insufficient for effective successor training and task generalization.

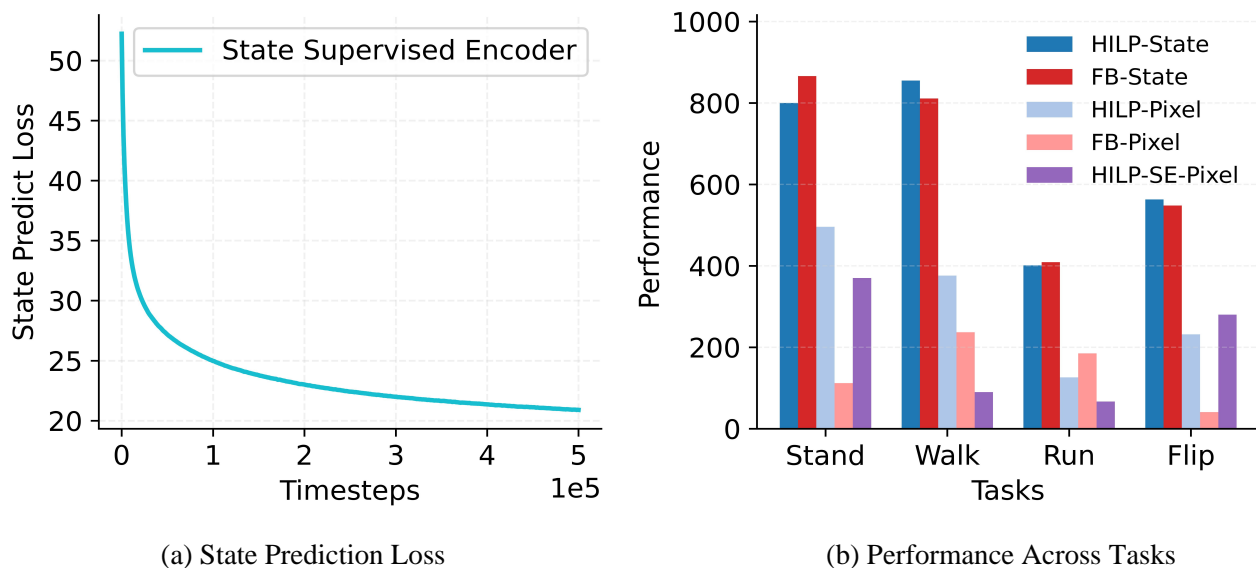

Figure 3. Experimental results of training an encoder using physical states as supervision in the Walker domain. (a) Prediction loss of the encoder during training; (b) Comparison of HILP and FB across different tasks under state input, visual input, and HILP with state-supervised encoder.

211 **Beyond Physical States: The Role of Dynamics-Relevant Attention.** Recognizing the limitations of physical state re-  
 212 gression, we pose a more fundamental question: what kind of representation is truly useful for successor representation  
 213 (SR) learning in visual URL? To explore this, we conduct attention analysis comparing the focus of encoders trained with  
 214 conventional SR objectives versus those guided by our proposed saliency-based approach. As illustrated in the main text,  
 215 conventional SR methods tend to capture static or background regions in observations, which offer poor dynamics-relevant  
 216 representations. In contrast, our Saliency-Guided Dynamics Encoder (SDE) consistently attends to dynamics-relevant re-  
 217 gions that are crucial for accurate successor estimation. This reveals a key insight: rather than attempting to reconstruct  
 218 physical states, it is more effective to learn dynamics-relevant representations that suitable for successor measure. By in-  
 219 troducing the saliency-guided dynamic representation learning, our method explicitly encourages the encoder to focus on  
 220 dynamics-relevant regions, resulting in significantly improved generalization in visual URL.

## I. Effectiveness of Saliency-Guided Dynamic Representation Learning

221

To evaluate the impact of Saliency-Guided Dynamic Representation Learning on learned representations, we provide detailed comparisons of saliency maps and activation heatmaps produced by our encoder and those from existing SR methods. As shown in Fig.4, baseline methods such as FB and HILP tend to focus on task-irrelevant regions of the observation, whereas our SRCP framework consistently attends to more accurate dynamics-relevant regions. This demonstrates the effectiveness of our method in guiding the encoder to learn more meaningful dynamics-relevant representations.

222

223

224

225

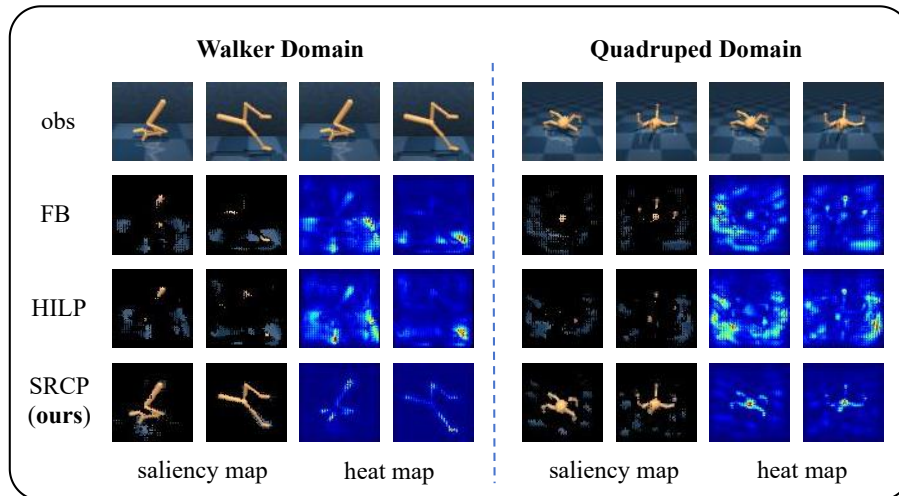

Figure 4. Detailed attention heat map of SR methods.

To further evaluate the quality of representations learned by SRCP’s saliency-guided dynamics encoder, we assess its ability to capture essential physical properties of the environment. Specifically, we compare SRCP with two SR method baselines, HILP and FB, by examining how effectively their pretrained encoders support the prediction of physical state information. Following a linear probing protocol, we freeze the encoder parameters and append a randomly initialized linear layer. This linear layer is trained to regress the underlying physical state vectors from the latent representations in the *Walker* domain. We track both the convergence speed and final regression accuracy to measure the informativeness of the learned features. As shown in Fig.5, the SRCP encoder achieves significantly faster convergence and lower prediction error than those from HILP and FB. This indicates that the saliency-guided dynamic representation learning in SRCP leads to more physically effective representations, which are better aligned with the true underlying dynamics of the environment. Such representations are essential not only for accurate successor measure estimation but also for zero-shot task generalization in visual URL.

226

227

228

229

230

231

232

233

234

235

236

237

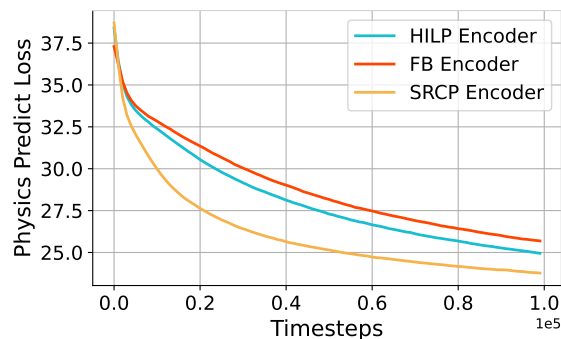

Figure 5. Prediction loss of physical states in walker domain.

238 **J. Full Ablation Study in RND Dataset**

239 To investigate the contribution of each component in the SRCP framework, we conduct an ablation study on all 16 tasks from  
 240 the RND dataset using 4 random seeds. The compared variants include:

- 241 • **HILP**: A baseline that jointly trains the encoder and successor features using the Hilbert basic feature learning and SR  
 242 objective.
- 243 • **SRCP w/o SE**: A variant of SRCP that removes the saliency-guided dynamics encoder, using the consistency policy with  
 244 an encoder trained via Hilbert basic feature learning and the SR objective.
- 245 • **SRCP w/o CM**: A variant of SRCP that removes the consistency actor, employing the saliency-guided dynamics encoder  
 246 while using standard policy learning.
- 247 • **SRCP**: The complete SRCP method, combining saliency-guided dynamics representation learning with consistency-based  
 248 policy learning.

249 As shown in Table 3, both **SRCP w/o SE** and **SRCP w/o CM** outperform the HILP baseline across most domains, confirming  
 250 the benefits of both the saliency-guided dynamics encoder and the consistency policy. Specifically, **SRCP w/o CM** performs  
 251 better than HILP in most tasks, demonstrating that saliency-guided representations improve generalization. Meanwhile,  
 252 **SRCP w/o SE** achieves higher performance in several tasks, indicating the effectiveness of the consistency policy in modeling  
 253 multi-modal skill-conditioned behaviors. The full **SRCP** model consistently achieves the best overall results across all  
 254 domains, validating that both components work synergistically to enhance generalization in visual URL.

Table 3. Full Ablation Study

| Domain    | Task          | HILP      | SRCP w/o SE | SRCP w/o CM | SRCP     |
|-----------|---------------|-----------|-------------|-------------|----------|
| Walker    | Stand         | 496 ± 73  | 519 ± 12    | 658 ± 38    | 671 ± 51 |
|           | Walk          | 376 ± 52  | 423 ± 12    | 449 ± 75    | 520 ± 32 |
|           | Run           | 126 ± 8   | 145 ± 4     | 173 ± 21    | 194 ± 38 |
|           | Flip          | 232 ± 41  | 293 ± 5     | 303 ± 13    | 369 ± 25 |
|           | Average       | 308       | 345         | 396         | 439      |
| Quadruped | Stand         | 327 ± 126 | 476 ± 9     | 595 ± 30    | 703 ± 22 |
|           | Walk          | 163 ± 45  | 253 ± 15    | 305 ± 14    | 339 ± 27 |
|           | Run           | 148 ± 19  | 289 ± 35    | 310 ± 32    | 361 ± 24 |
|           | Jump          | 244 ± 122 | 391 ± 34    | 413 ± 18    | 535 ± 14 |
|           | Average       | 221       | 352         | 406         | 485      |
| Cheetah   | Walk          | 895 ± 33  | 893 ± 44    | 807 ± 26    | 859 ± 34 |
|           | Walk Backward | 927 ± 35  | 951 ± 23    | 954 ± 22    | 934 ± 45 |
|           | Run           | 276 ± 46  | 277 ± 14    | 292 ± 25    | 322 ± 44 |
|           | Run Backward  | 297 ± 46  | 278 ± 3     | 338 ± 6     | 293 ± 42 |
|           | Average       | 599       | 600         | 598         | 602      |
| Jaco      | Top Left      | 29 ± 4    | 30 ± 8      | 49 ± 3      | 53 ± 9   |
|           | Top Right     | 35 ± 13   | 54 ± 2      | 63 ± 9      | 60 ± 7   |
|           | Bottom Left   | 25 ± 3    | 43 ± 3      | 23 ± 4      | 43 ± 8   |
|           | Bottom Right  | 31 ± 11   | 49 ± 7      | 39 ± 4      | 42 ± 8   |
|           | Average       | 30        | 44          | 43          | 50       |

## K. Effectiveness of Representation Learning Methods for Visual URL

To evaluate the impact of different representation learning strategies under the HILP framework, we compare five variants on the RND dataset: the original HILP, HILP-TACO, HILP-TACOP, HILP-SE (SRCP w/o CM), and the full SRCP method. HILP-TACO and HILP-TACOP incorporate the state-of-the-art representation learning methods TACO [33] and TACO-Premier [34] into HILP, aiming to decouple the encoder from the successor representation objective. In contrast, HILP-SE and SRCP adopt our proposed saliency-guided dynamics encoder to learn dynamics-relevant visual representations.

As shown in Table 4, HILP-TACO and HILP-TACOP achieve limited improvements over HILP, with performance gains in some tasks (e.g., walker\_stand or jaco\_reach\_top\_left) but substantial drops in others (e.g., walker\_walk or cheetah\_run\_backward), leading to inconsistent generalization. This suggests that applying generic representation learning alone is insufficient for achieving robust generalization performance across diverse tasks. In contrast, HILP-SE significantly outperforms all three baselines in every domain, particularly in *Walker* and *Quadruped*, where it improves average zero-shot returns by over 90% compared to HILP. Furthermore, SRCP consistently achieves the best performance across most tasks, demonstrating that combining the saliency-guided dynamics encoder with consistency policy learning further enhances multi-modal action distribution modeling ability and generalization. These results clearly highlight the superiority of the proposed saliency-guided dynamics representation in visual URL. It enables the agent to focus on dynamics-relevant features and supports more effective zero-shot generalization.

Table 4. Zero-shot Performance of HILP Variants on the RND Dataset

| Domain    | Task          | HILP      | HILP-TACO | HILP-TACOP | HILP-SE  | SRCP     |
|-----------|---------------|-----------|-----------|------------|----------|----------|
| Walker    | Stand         | 496 ± 73  | 388 ± 8   | 622 ± 24   | 658 ± 38 | 671 ± 51 |
|           | Walk          | 376 ± 52  | 111 ± 6   | 339 ± 14   | 449 ± 75 | 520 ± 32 |
|           | Run           | 126 ± 8   | 73 ± 3    | 135 ± 10   | 173 ± 21 | 194 ± 38 |
|           | Flip          | 232 ± 41  | 99 ± 8    | 199 ± 24   | 303 ± 13 | 369 ± 25 |
|           | Average       | 308       | 168       | 324        | 396      | 439      |
| Quadruped | Stand         | 327 ± 126 | 234 ± 18  | 195 ± 16   | 595 ± 30 | 703 ± 22 |
|           | Walk          | 163 ± 45  | 91 ± 19   | 122 ± 13   | 305 ± 14 | 339 ± 27 |
|           | Run           | 148 ± 19  | 73 ± 10   | 101 ± 6    | 310 ± 32 | 361 ± 24 |
|           | Jump          | 244 ± 122 | 86 ± 13   | 149 ± 16   | 413 ± 18 | 535 ± 14 |
|           | Average       | 221       | 121       | 142        | 406      | 485      |
| Cheetah   | Walk          | 895 ± 33  | 693 ± 33  | 599 ± 33   | 807 ± 26 | 859 ± 34 |
|           | Walk Backward | 927 ± 35  | 422 ± 15  | 534 ± 89   | 954 ± 22 | 934 ± 45 |
|           | Run           | 276 ± 46  | 136 ± 6   | 185 ± 7    | 292 ± 25 | 322 ± 44 |
|           | Run Backward  | 297 ± 46  | 80 ± 2    | 124 ± 24   | 338 ± 6  | 293 ± 42 |
|           | Average       | 599       | 333       | 361        | 598      | 602      |
| Jaco      | Top Left      | 29 ± 4    | 46 ± 4    | 33 ± 2     | 49 ± 3   | 53 ± 9   |
|           | Top Right     | 35 ± 13   | 43 ± 3    | 24 ± 3     | 63 ± 9   | 60 ± 7   |
|           | Bottom Left   | 25 ± 3    | 25 ± 6    | 41 ± 3     | 23 ± 4   | 43 ± 8   |
|           | Bottom Right  | 31 ± 11   | 23 ± 4    | 24 ± 6     | 39 ± 4   | 35 ± 10  |
|           | Average       | 30        | 34        | 31         | 43       | 48       |

271 **L. Experimental Result on Forward Backward Representation**

272 To further validate the generality of SRCP, we integrate the Forward-Backward (FB) [27] representation into the SRCP  
 273 framework, denoted as SRCP(FB). Table 5 presents the detailed zero-shot performance of FB and SRCP(FB) across four  
 274 domains (Walker, Quadruped, Cheetah, and Jaco) in the APS dataset. SRCP(FB) consistently achieves higher returns in all  
 275 tasks, with particularly notable improvements in the Walker and Cheetah domains. These results align with the findings in  
 276 the main paper, confirming that SRCP provides a general and effective framework for enhancing the representation quality,  
 277 skill expressiveness, and zero-shot generalization of various SR-based methods.

Table 5. Zero-shot Performance of FB and SRCP(FB) on the APS Dataset

| Domain    | Task          | FB        | SRCP(FB)   |
|-----------|---------------|-----------|------------|
| Walker    | Stand         | 304 ± 122 | 680 ± 14   |
|           | Walk          | 81 ± 14   | 478 ± 18   |
|           | Run           | 51 ± 13   | 152 ± 12   |
|           | Flip          | 66 ± 8    | 274 ± 13   |
|           | Average       | 126       | <b>396</b> |
| Quadruped | Stand         | 421 ± 16  | 583 ± 21   |
|           | Walk          | 239 ± 12  | 294 ± 10   |
|           | Run           | 208 ± 14  | 293 ± 8    |
|           | Jump          | 294 ± 9   | 421 ± 32   |
|           | Average       | 318       | <b>398</b> |
| Cheetah   | Walk          | 12 ± 2    | 291 ± 84   |
|           | Walk Backward | 48 ± 7    | 495 ± 19   |
|           | Run           | 13 ± 5    | 57 ± 7     |
|           | Run Backward  | 9 ± 4     | 103 ± 13   |
|           | Average       | 21        | <b>237</b> |
| Jaco      | Top Left      | 22 ± 6    | 46 ± 6     |
|           | Top Right     | 23 ± 4    | 21 ± 3     |
|           | Bottom Left   | 36 ± 13   | 48 ± 15    |
|           | Bottom Right  | 19 ± 6    | 21 ± 5     |
|           | Average       | 25        | <b>34</b>  |

## M. Full Hyperparameter Ablation Study

278

We provide a comprehensive ablation study on the sensitivity of SRCP to two key hyperparameters,  $\omega$  and  $\beta$ . Table 6 shows effect of  $\omega$  in Walker domain,  $\omega$  controls the strength of skill-conditioned guidance. Setting  $\omega = 0$  leads to a marked performance drop, while moderate values enhance generalization. In contrast, large  $\omega$  over-constrains the policy and slightly reduces performance. Table 7 analyzes the effect of  $\beta$  in Walker domain, which controls the weight of saliency guidance in representation learning. Increasing  $\beta$  improves generalization up to a point, after which excessive emphasis on salient regions weakens the model’s ability to capture dynamics cues. Overall, SRCP maintains stable performance across a wide range of hyperparameters, with balanced  $\omega$  and  $\beta$  achieving the best trade-off between skill and saliency guidance.

279  
280  
281  
282  
283  
284  
285

| Walker  | $\omega = 0$ | $\omega = 2$                   | $\omega = 3$                   | $\omega = 4$ | $\omega = 6$ |
|---------|--------------|--------------------------------|--------------------------------|--------------|--------------|
| Stand   | 176 $\pm$ 7  | 609 $\pm$ 40                   | <b>671 <math>\pm</math> 51</b> | 498 $\pm$ 30 | 363 $\pm$ 16 |
| Walk    | 42 $\pm$ 4   | 415 $\pm$ 40                   | <b>520 <math>\pm</math> 32</b> | 464 $\pm$ 16 | 79 $\pm$ 13  |
| Run     | 32 $\pm$ 6   | 136 $\pm$ 18                   | <b>194 <math>\pm</math> 38</b> | 164 $\pm$ 11 | 70 $\pm$ 14  |
| Flip    | 59 $\pm$ 7   | <b>374 <math>\pm</math> 18</b> | 369 $\pm$ 25                   | 358 $\pm$ 18 | 206 $\pm$ 10 |
| Average | 77           | 384                            | <b>439</b>                     | 371          | 180          |

Table 6. Ablation study of parameter  $\omega$  in SRCP on Walker domain in RND dataset, with 4 random seeds per task.

| Walker  | $\beta = 0$  | $\beta = 0.2$ | $\beta = 0.5$                  | $\beta = 1$  |
|---------|--------------|---------------|--------------------------------|--------------|
| Stand   | 544 $\pm$ 20 | 550 $\pm$ 26  | <b>671 <math>\pm</math> 51</b> | 583 $\pm$ 18 |
| Walk    | 354 $\pm$ 42 | 458 $\pm$ 19  | <b>520 <math>\pm</math> 32</b> | 484 $\pm$ 48 |
| Run     | 156 $\pm$ 12 | 170 $\pm$ 35  | <b>194 <math>\pm</math> 38</b> | 169 $\pm$ 23 |
| Flip    | 310 $\pm$ 15 | 315 $\pm$ 11  | <b>369 <math>\pm</math> 25</b> | 346 $\pm$ 5  |
| Average | 341          | 373           | <b>439</b>                     | 396          |

Table 7. Ablation study of parameter  $\beta$  in SRCP on Walker domain in RND dataset, with 4 random seeds per task.

286 **N. Computational Cost**

287 As shown in Table 8, the proposed SRCP framework achieves training time and memory consumption that are comparable  
 288 to those of the baseline methods across all experimental settings. By explicitly decoupling representation learning and value  
 289 learning into separate optimization objectives, SRCP avoids the computationally expensive joint optimization commonly  
 290 adopted in conventional end-to-end frameworks. This structural design effectively offsets the additional computational over-  
 291 head introduced by saliency map generation, leading to similar wall-clock training time compared to the baselines. Overall,  
 292 SRCP only incurs minor and acceptable extra overhead. On the one hand, the decoupled training paradigm eliminates chained  
 293 backpropagation across multiple modules, which significantly reduces gradient computation complexity. On the other hand,  
 294 the saliency inference module is designed to be lightweight and efficient, introducing negligible latency during training.  
 295 Meanwhile, the consistency-based policy regularization imposes computational costs comparable to those of standard policy  
 296 optimization objectives, without introducing heavy additional computation. Consequently, the total training cost of SRCP  
 297 remains competitive with state-of-the-art approaches despite the integration of multiple learning objectives.

Table 8. Computational cost on an A800 GPU for 5M steps.

| Metric             | FB          | HILP       | SRCP |
|--------------------|-------------|------------|------|
| Training Time (h)↓ | <b>23.1</b> | 24.2       | 24.4 |
| Memory Usage (GB)↓ | 9.6         | <b>8.8</b> | 9.1  |

298 **O. Visually Complex Environments**

299 To further validate the generalization ability of SRCP in complex and noisy visual environments, we evaluate its performance  
 300 on the DMC-GB benchmark, which contains various types of visual distractions. Specifically, we train SRCP on environ-  
 301 ments with clean backgrounds and then test it under two challenging visual settings for the Walker task: Color Easy (mild  
 302 color perturbations) and Color Hard (severe color variations). As reported in Table 9, SRCP consistently outperforms the  
 303 baseline methods FB and HILP across both settings, which demonstrates its strong generalization capability against diverse  
 304 task dynamics and visual appearance variations. In addition to visual robustness, we assess the scalability and cross-domain  
 305 applicability of SRCP beyond locomotion tasks. To this end, we conduct experiments on the Point Mass Maze navigation  
 306 task, a representative goal-directed control problem distinct from continuous locomotion. The quantitative results are pre-  
 307 sented in Table 10. SRCP achieves significantly improved performance compared with all baselines, indicating that the  
 308 proposed framework can effectively transfer its learning paradigm to different task domains and maintain strong decision-  
 309 making performance. For a more comprehensive evaluation under complex visual perturbations, we further test SRCP on  
 310 the full DMC-GB benchmark with multiple types of visual disturbances. The agent is trained on clean backgrounds and then  
 311 evaluated under three increasingly challenging test scenarios: dynamic easy color perturbations, hard color perturbations, and  
 312 natural video distractions. Consistent with previous observations, the results in Table 9 confirm that SRCP still outperforms  
 313 FB and HILP by a clear margin, further verifying its superior generalization ability in the presence of complex and realistic  
 314 visual variations. In summary, experiments on both the DMC-GB visual generalization benchmark and the Point Mass Maze  
 315 navigation task demonstrate that SRCP not only achieves strong robustness to visual noise and domain shifts but also scales  
 316 effectively across different task categories, showing wide applicability in visual reinforcement learning.

Table 9. Performance on DMC-GB Walker.

| Domain | Task    | Color Easy |          |            | Color Hard |          |            | Video Easy |          |            |
|--------|---------|------------|----------|------------|------------|----------|------------|------------|----------|------------|
|        |         | FB         | HILP     | SRCP       | FB         | HILP     | SRCP       | FB         | HILP     | SRCP       |
| Walker | Stand   | 243 ± 80   | 364 ± 89 | 639 ± 69   | 165 ± 66   | 282 ± 74 | 506 ± 58   | 127 ± 42   | 176 ± 32 | 277 ± 48   |
|        | Walk    | 62 ± 29    | 110 ± 54 | 423 ± 47   | 54 ± 27    | 73 ± 34  | 279 ± 45   | 47 ± 14    | 62 ± 13  | 162 ± 47   |
|        | Run     | 46 ± 25    | 55 ± 18  | 165 ± 31   | 39 ± 16    | 49 ± 21  | 113 ± 36   | 38 ± 8     | 40 ± 5   | 78 ± 10    |
|        | Flip    | 59 ± 22    | 98 ± 34  | 371 ± 42   | 51 ± 25    | 69 ± 36  | 156 ± 38   | 47 ± 11    | 56 ± 11  | 123 ± 44   |
|        | Average | 103        | 157      | <b>400</b> | 77         | 118      | <b>264</b> | 65         | 84       | <b>160</b> |

Table 10. Performance on Point Mass Maze navigation tasks.

| Method | Reach Top Left | Reach Top Right | Reach Bottom Left | Reach Bottom Right | Average    |
|--------|----------------|-----------------|-------------------|--------------------|------------|
| FB     | 14 ± 5         | 3 ± 1           | 1 ± 1             | 0 ± 0              | 5          |
| HILP   | 471 ± 51       | 112 ± 19        | 36 ± 10           | 2 ± 1              | 155        |
| SRCP   | 635 ± 95       | 166 ± 55        | 67 ± 18           | 10 ± 6             | <b>220</b> |

## P. Difference between Diffusion Models and Consistency Models

We further compare SRCP with the representative diffusion policy on the challenging Proto Quadruped locomotion tasks to verify its efficiency and practical deployment potential. The quantitative comparison is summarized in Table 11. On one hand, the full diffusion model with 40 denoising steps achieves slightly higher task performance than SRCP, but this improvement comes at the cost of drastically increased computation: it consumes nearly 2.5× the total training time of SRCP. On the other hand, when diffusion is constrained to only a single denoising step for inference efficiency, its performance drops significantly and becomes considerably worse than SRCP. In contrast, SRCP maintains strong task performance with inherently efficient single-step execution, without relying on iterative denoising. These results clearly demonstrate that the proposed consistency policy effectively balances performance and computational overhead, yielding a superior performance–computation trade-off compared with diffusion-based policies for real-world robotic control.

Table 11. Comparison between diffusion models and SRCP.

| Method               | Stand↑   | Walk↑    | Run↑     | Jump↑    | Average↑   | Time (h) ↓  |
|----------------------|----------|----------|----------|----------|------------|-------------|
| Diffusion (1 step)   | 626 ± 50 | 308 ± 37 | 324 ± 18 | 397 ± 40 | 414        | <b>24.7</b> |
| Diffusion (40 steps) | 724 ± 30 | 357 ± 43 | 354 ± 17 | 531 ± 26 | <b>492</b> | 64.8        |
| SRCP                 | 703 ± 22 | 339 ± 27 | 361 ± 24 | 535 ± 14 | 485        | 25.4        |

## Q. Inference Budget

We further evaluate the sensitivity of SRCP to the number of task-specific transitions used during adaptation, by conducting experiments on the Walker domain with a wide range of inference budgets (as shown in Table 12). When only 100 task-specific transitions are available, the overall performance shows a slight decrease due to the limited task-specific information. However, across the range from 500 up to 20,000 transitions, the performance of SRCP remains stable and consistent without significant degradation. This observation demonstrates that SRCP can achieve reliable adaptation with only a modest number of task-specific transitions, and is robust to the choice of inference budget, making it suitable for real-world scenarios where collecting large amounts of task-specific data can be costly or impractical.

Table 12. Effect of inference transition on SRCP performance.

| Inference Transitions: | 100      | 500      | 1k       | 5k       | 10k      | 20k        |
|------------------------|----------|----------|----------|----------|----------|------------|
| Stand                  | 828 ± 26 | 817 ± 19 | 823 ± 35 | 834 ± 34 | 830 ± 39 | 834 ± 32   |
| Walk                   | 466 ± 87 | 478 ± 35 | 508 ± 47 | 504 ± 46 | 504 ± 66 | 506 ± 31   |
| Run                    | 207 ± 42 | 216 ± 33 | 224 ± 22 | 220 ± 26 | 227 ± 16 | 238 ± 12   |
| Flip                   | 376 ± 86 | 418 ± 26 | 413 ± 24 | 434 ± 35 | 428 ± 75 | 420 ± 28   |
| blue!10 Average        | 469      | 482      | 492      | 498      | 497      | <b>500</b> |

## References

- [1] Chenjia Bai, Rushuai Yang, Qiaosheng Zhang, Kang Xu, Yi Chen, Ting Xiao, and Xuelong Li. Constrained ensemble exploration for unsupervised skill discovery. In *International Conference on Machine Learning*, pages 2418–2442, 2024. 8
- [2] Randall Balestriero and Yann LeCun. Contrastive and non-contrastive self-supervised learning recover global and local spectral embedding methods. In *Advances in Neural Information Processing Systems*, pages 26671–26685, 2022. 8, 10
- [3] André Barreto, Will Dabney, Rémi Munos, Jonathan J Hunt, Tom Schaul, Hado P van Hasselt, and David Silver. Successor features for transfer in reinforcement learning. In *Advances in Neural Information Processing Systems*, page 4058–4068, 2017. 8

- 342 [4] Yuri Burda, Harrison Edwards, Amos Storkey, and Oleg Klimov. Exploration by random network distillation. In *International*  
343 *Conference on Learning Representations*, 2019. 8, 9
- 344 [5] Huayu Chen, Cheng Lu, Chengyang Ying, Hang Su, and Jun Zhu. Offline reinforcement learning via high-fidelity generative behavior  
345 modeling. In *International Conference on Learning Representations*, 2023. 8
- 346 [6] Yuhui Chen, Haoran Li, and Dongbin Zhao. Boosting continuous control with consistency policy. In *Proceedings of the 23rd*  
347 *International Conference on Autonomous Agents and Multiagent Systems*, page 335–344, 2024. 8
- 348 [7] Peter Dayan. Improving generalization for temporal difference learning: The successor representation. In *Neural Computation*, pages  
349 613–624, 1993. 8, 10
- 350 [8] Yarats Denis, Brandfonbrener David, Liu Hao, Laskin Michael, Abbeel Pieter, Lazaric Alessandro, and Pinto Lerrel. Don’t change  
351 the algorithm, change the data: Exploratory data for offline reinforcement learning. *arXiv preprint arXiv:2201.13425*, 2022. 9
- 352 [9] Zihan Ding and Chi Jin. Consistency models as a rich and efficient policy class for reinforcement learning. In *International Confer-*  
353 *ence on Learning Representations*, 2024. 8
- 354 [10] Benjamin Eysenbach, Abhishek Gupta, Julian Ibarz, and Sergey Levine. Diversity is all you need: Learning skills without a reward  
355 function. In *International Conference on Learning Representations*, 2019. 8
- 356 [11] Jonathan Ho, Ajay Jain, and Pieter Abbeel. Denoising diffusion probabilistic models. In *Advances in Neural Information Processing*  
357 *Systems*, pages 6840–6851, 2020. 8
- 358 [12] Bingyi Kang, Xiao Ma, Chao Du, Tianyu Pang, and Shuicheng Yan. Efficient diffusion policies for offline reinforcement learning. In  
359 *Proceedings of the 37th International Conference on Neural Information Processing Systems*, 2023. 8
- 360 [13] Michael Laskin, Denis Yarats, Hao Liu, Kimin Lee, Albert Zhan, Kevin Lu, Catherine Cang, Lerrel Pinto, and Pieter Abbeel. Urlb:  
361 Unsupervised reinforcement learning benchmark. *Advances in Neural Information Processing Systems*, 2021. 8, 9
- 362 [14] Michael Laskin, Hao Liu, Xue Bin Peng, Denis Yarats, Aravind Rajeswaran, and Pieter Abbeel. Unsupervised reinforcement learning  
363 with contrastive intrinsic control. pages 34478–34491, 2022. 8
- 364 [15] Haoran Li, Zhennan Jiang, yuhui Chen, and Dongbin Zhao. Generalizing consistency policy to visual rl with prioritized proximal  
365 experience regularization. In *The Thirty-eighth Annual Conference on Neural Information Processing Systems*, 2024. 8
- 366 [16] Hao Liu and Pieter Abbeel. Aps: Active pretraining with successor features. In *International Conference on Machine Learning*,  
367 pages 6736–6747, 2021. 9
- 368 [17] Hao Liu and Pieter Abbeel. Behavior from the void: Unsupervised active pre-training. In *Advances in Neural Information Processing*  
369 *Systems*, pages 18459–18473, 2021. 8, 9
- 370 [18] Seohong Park, Tobias Kreiman, and Sergey Levine. Foundation policies with Hilbert representations. In *Proceedings of the 41st*  
371 *International Conference on Machine Learning*, pages 39737–39761. PMLR, 2024. 8, 10
- 372 [19] Seohong Park, Oleh Rybkin, and Sergey Levine. Metra: Scalable unsupervised rl with metric-aware abstraction. In *International*  
373 *Conference on Learning Representations*, 2024. 8
- 374 [20] Deepak Pathak, Dhiraj Gandhi, and Abhinav Gupta. Self-supervised exploration via disagreement. In *International Conference on*  
375 *Machine Learning*, pages 5062–5071, 2019. 8
- 376 [21] Tim Pearce, Tabish Rashid, Anssi Kanervisto, Dave Bignell, Mingfei Sun, Raluca Georgescu, Sergio Valcarcel Macua, Shan Zheng  
377 Tan, Ida Momennejad, Katja Hofmann, et al. Imitating human behaviour with diffusion models. In *International Conference on*  
378 *Learning Representations*, 2023. 8
- 379 [22] Lucas Pinheiro Cinelli, Matheus Araújo Marins, Eduardo Ant3nio Barros da Silva, and S3rgio Lima Netto. Variational autoencoder.  
380 In *Variational methods for machine learning with applications to deep networks*, pages 111–149. Springer, 2021. 10
- 381 [23] Tongzheng Ren, Tianjun Zhang, Lisa Lee, Joseph E Gonzalez, Dale Schuurmans, and Bo Dai. Spectral decomposition representation  
382 for reinforcement learning. In *International Conference on Learning Representations*, 2023. 8
- 383 [24] Tom Schaul, Daniel Horgan, Karol Gregor, and David Silver. Universal value function approximators. In *International Conference*  
384 *on Machine Learning*, pages 1312–1320, 2015. 8
- 385 [25] Yang Song, Prafulla Dhariwal, Mark Chen, and Ilya Sutskever. Consistency models. In *International Conference on Machine*  
386 *Learning*, pages 32211–32252. PMLR, 2023. 8
- 387 [26] R.S. Sutton and A.G. Barto. Reinforcement learning: An introduction. *IEEE Transactions on Neural Networks*, 9(5):1054–1054,  
388 1998. 8
- 389 [27] Ahmed Touati and Yann Ollivier. Learning one representation to optimize all rewards. In *Advances in Neural Information Processing*  
390 *Systems*, pages 13–23, 2021. 5, 8, 16
- 391 [28] Ahmed Touati, J3r3my Rapin, and Yann Ollivier. Does zero-shot reinforcement learning exist? In *International Conference on*  
392 *Learning Representations*, 2023. 8, 10
- 393 [29] J Wang, Q Zhang, and D Zhao. Dynamic-horizon model-based value estimation with latent imagination. *IEEE Transactions on*  
394 *Neural Networks and Learning Systems*, 35(7):8812–8825, 2024. 8
- 395 [30] Yifan Wu, George Tucker, and Ofir Nachum. The laplacian in rl: Learning representations with efficient approximations. In *Interna-*  
396 *tional Conference on Learning Representations*, 2018. 8, 10
- 397 [31] Denis Yarats, Rob Fergus, Alessandro Lazaric, and Lerrel Pinto. Reinforcement learning with prototypical representations. In  
398 *International Conference on Machine Learning*, pages 11920–11931. PMLR, 2021. 8, 9

- [32] Qichao Zhang, Yinfeng Gao, Yikang Zhang, Youtian Guo, Dawei Ding, Yunpeng Wang, Peng Sun, and Dongbin Zhao. Trajgen: Generating realistic and diverse trajectories with reactive and feasible agent behaviors for autonomous driving. *IEEE Transactions on Intelligent Transportation Systems*, 23(12):24474–24487, 2022. 8 399 400 401
- [33] Ruijie Zheng, Xiyao Wang, Yanchao Sun, Shuang Ma, Jieyu Zhao, Huazhe Xu, Hal Daumé, and Furong Huang. Taco: temporal latent action-driven contrastive loss for visual reinforcement learning. In *Proceedings of the 37th International Conference on Neural Information Processing Systems*, 2023. 15 402 403 404
- [34] Ruijie Zheng, Yongyuan Liang, Xiyao Wang, Shuang Ma, Hal Daumé III, Huazhe Xu, John Langford, Praveen Palanisamy, Kalyan Shankar Basu, and Furong Huang. Premier-taco is a few-shot policy learner: pretraining multitask representation via temporal action-driven contrastive loss. In *Proceedings of the 41st International Conference on Machine Learning*. JMLR.org, 2024. 15 405 406 407
